# Supplementary material
Source: Springer Nature journal article supplement (https://www.springermedizin.de/resource/supplementary/13063_2009_379_MOESM1_ESM.pdf/9618108)
Supplement: MOESM1 [file 9618108]

Visit 1: Screening

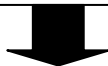

Visit 2: (day of surgery)  
Peripheral bypass reconstruction

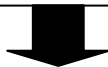

Visit 3: (day 2 after surgery)

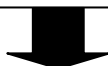

Visit 4: (day of discharge)

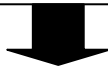

Visit 5: (30 ±10 days after surgery)

**Defines primary  
and secondary  
endpoint**

**Defines secondary  
endpoint**
